# Supplementary material for: Prediction of Adrenocortical Carcinoma Relapse and Prognosis with a Set of Novel Multigene Panels
Source: MDPI journal article supplement (doi:10.3390/cancers14112805), 2022-06-05
Supplement: s1 [file s1]

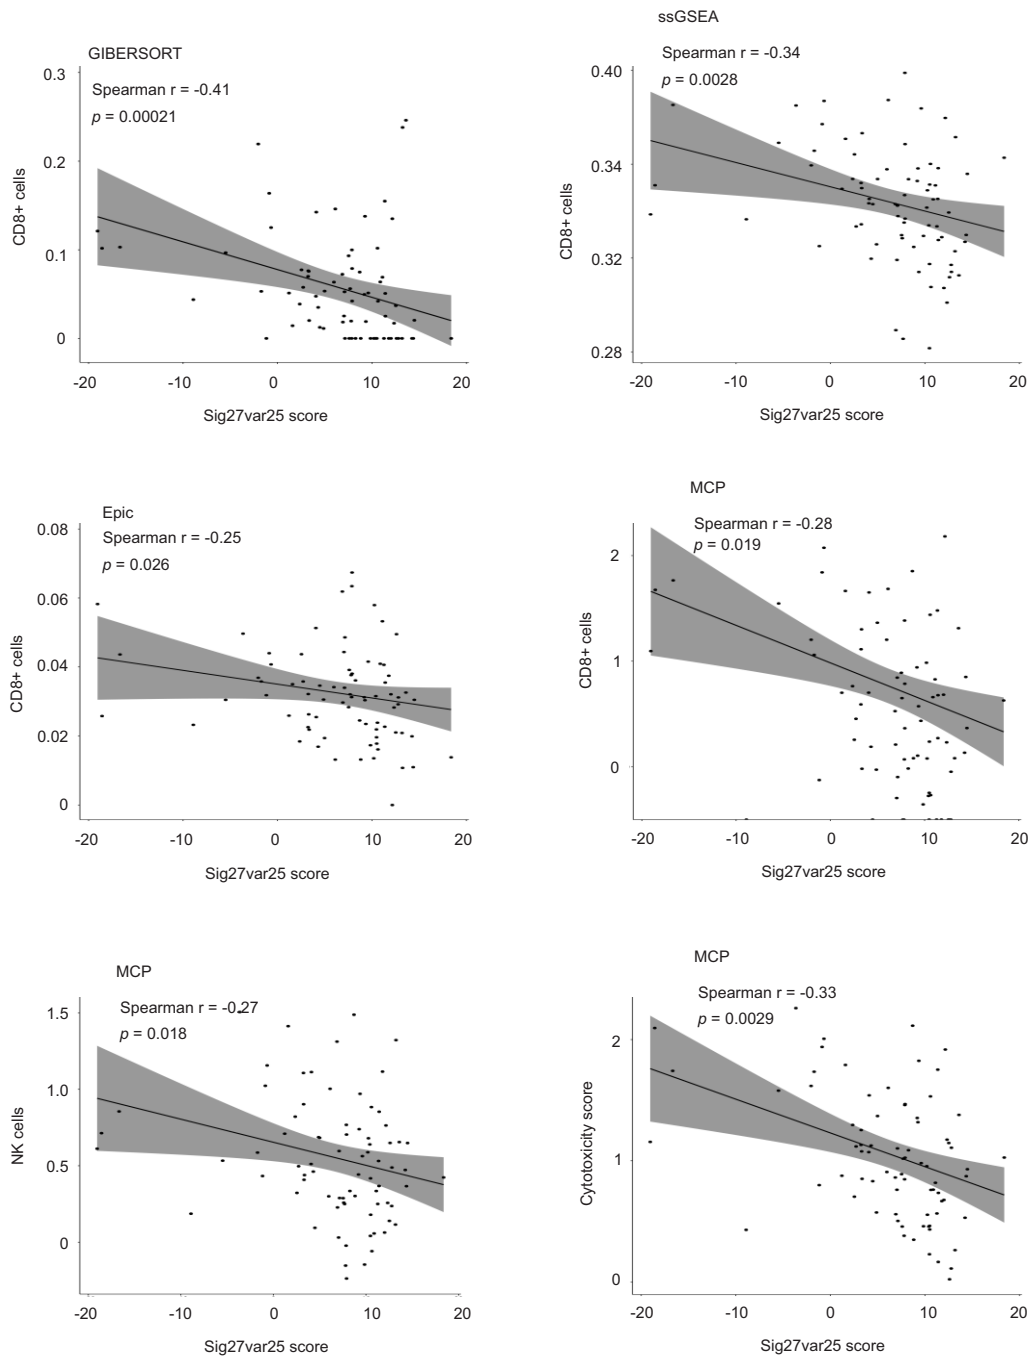

Figure S8: Correlations of Sig27var25 scores with CD8+, NK, and cytotoxic scores. The programs used to produce these correlations are indicated, i.e. GIBERSORT, ssGSEA, Epic, and MCP.
