# Supplementary material for: Prediction of Adrenocortical Carcinoma Relapse and Prognosis with a Set of Novel Multigene Panels
Source: MDPI journal article supplement (doi:10.3390/cancers14112805), 2022-06-05
Supplement: s1 [file s1]

## Supplementary Figure S1

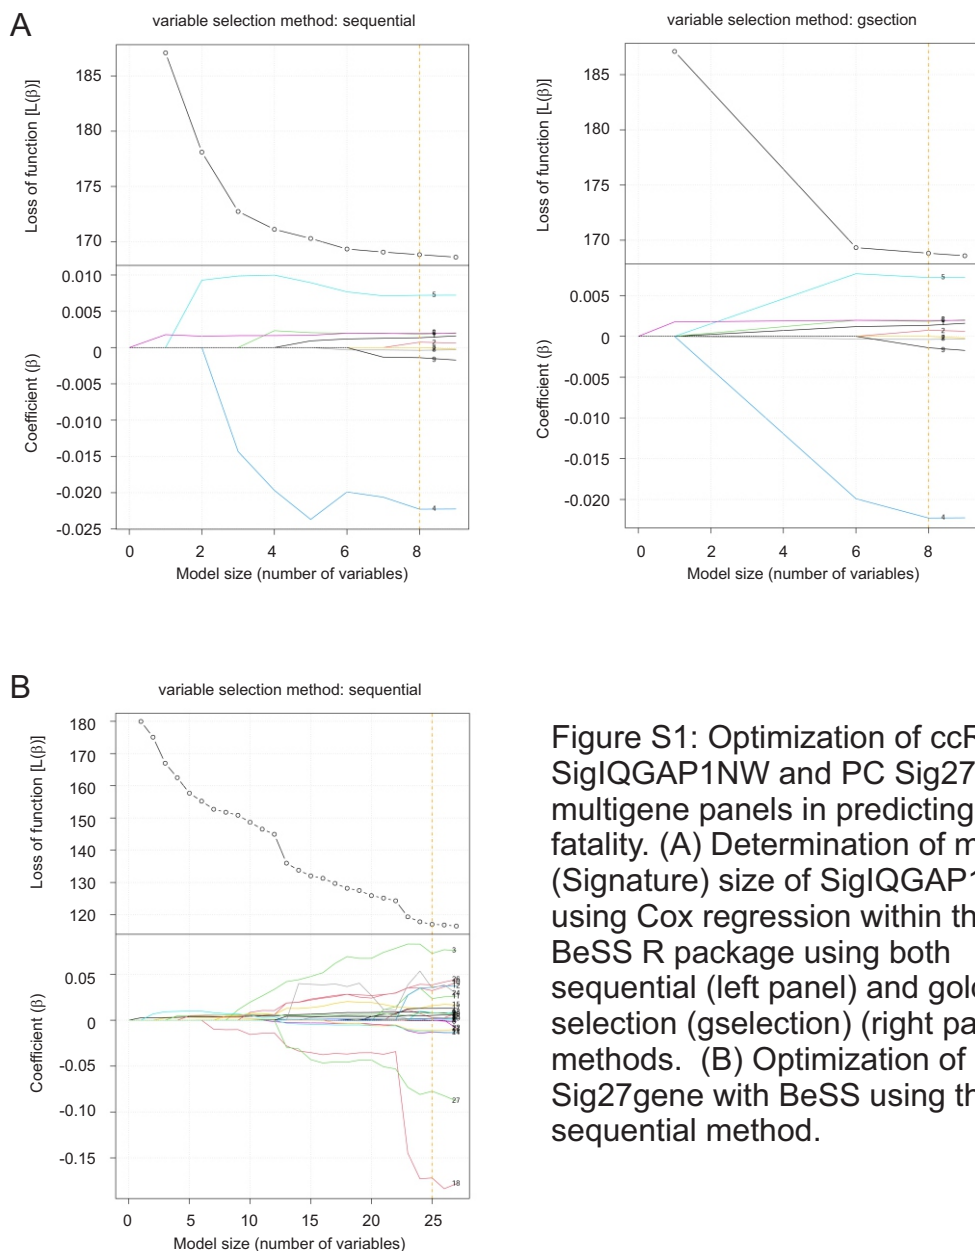

Figure S1: Optimization of ccRCC SigIQGAP1NW and PC Sig27gene multigene panels in predicting ACC fatality. (A) Determination of model (Signature) size of SigIQGAP1NW using Cox regression within the BeSS R package using both sequential (left panel) and golden selection (gselection) (right panel) methods. (B) Optimization of Sig27gene with BeSS using the sequential method.
