# Supplementary material for: Prediction of Adrenocortical Carcinoma Relapse and Prognosis with a Set of Novel Multigene Panels
Source: MDPI journal article supplement (doi:10.3390/cancers14112805), 2022-06-05
Supplement: s1 [file s1]

## Supplementary Figure S4

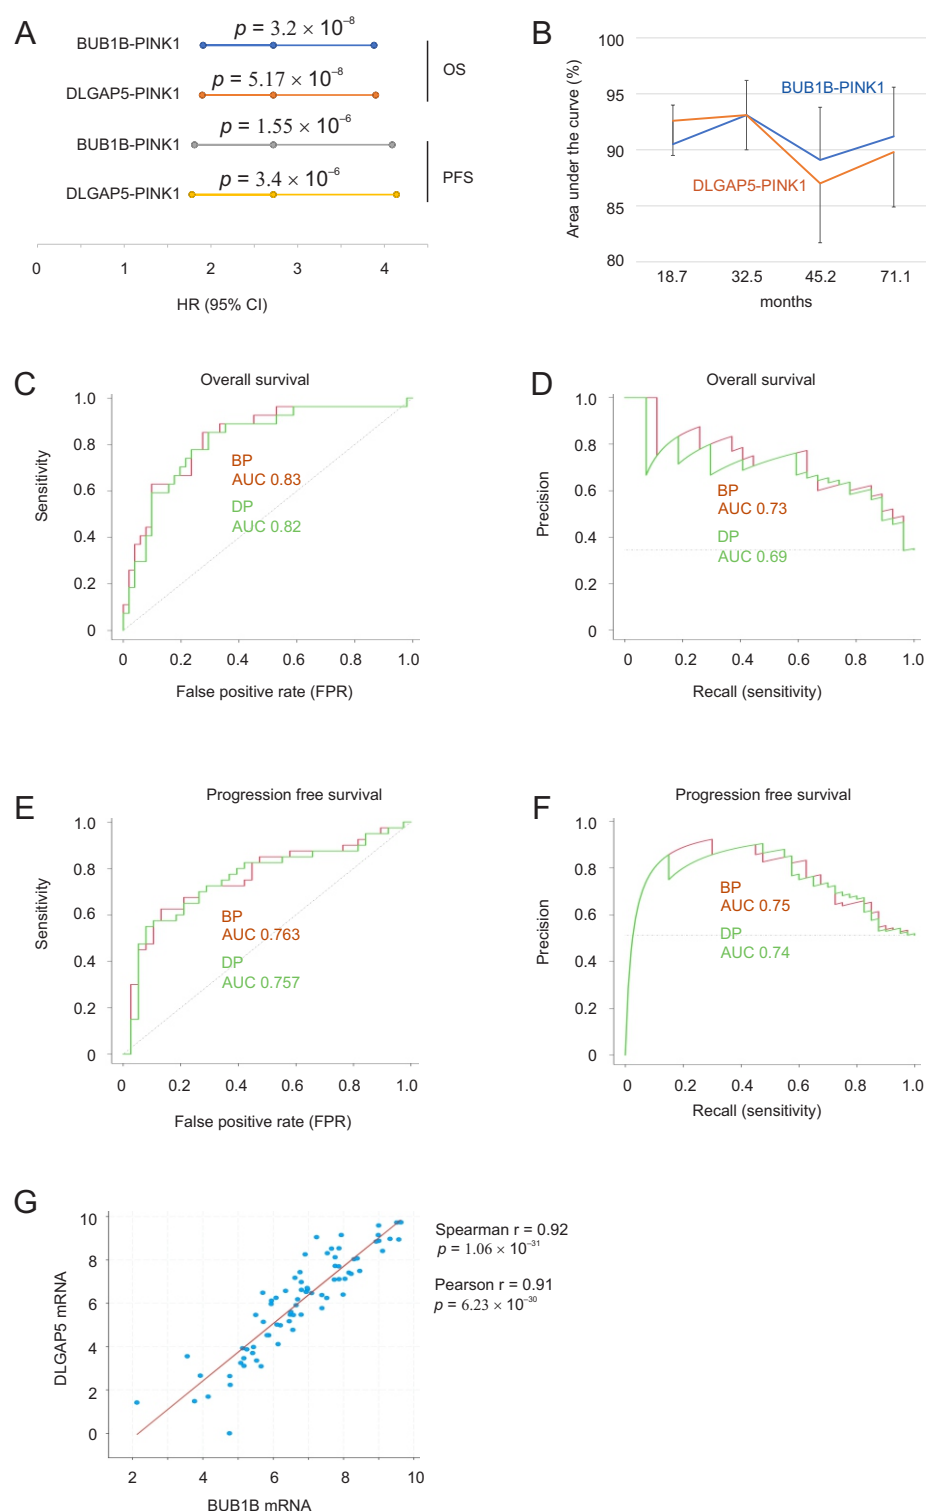

Figure S4: Evaluation of the biomarker potential of two public signatures: BUB1B\_PINK1 and DLGAP5\_PINK1. (A) Forestplot for HR, 95% CI, and p values for BUB1B\_PINK1 and DLGAP5\_PINK1 in predicting poor OS and worse PFS. (B) Time-dependent ROC-AUC curves for the indicated panels in stratification of poor OS. (C, D) ROC-AUC and PR-AUC curves for the indicated signatures in discrimination of poor OS. (E, F) ROC-AUC and PR-AUC curves for the indicated signatures in stratification of worse PFS. (G) Correlations between BUB1B and DLGAP5 mRNA expression in the TCGA pan-cancer ACC dataset were produced using tools provided by cBioPortal.
