# Supplementary material for: Prediction of Adrenocortical Carcinoma Relapse and Prognosis with a Set of Novel Multigene Panels
Source: MDPI journal article supplement (doi:10.3390/cancers14112805), 2022-06-05
Supplement: s1 [file s1]

Supplementary Figure S7

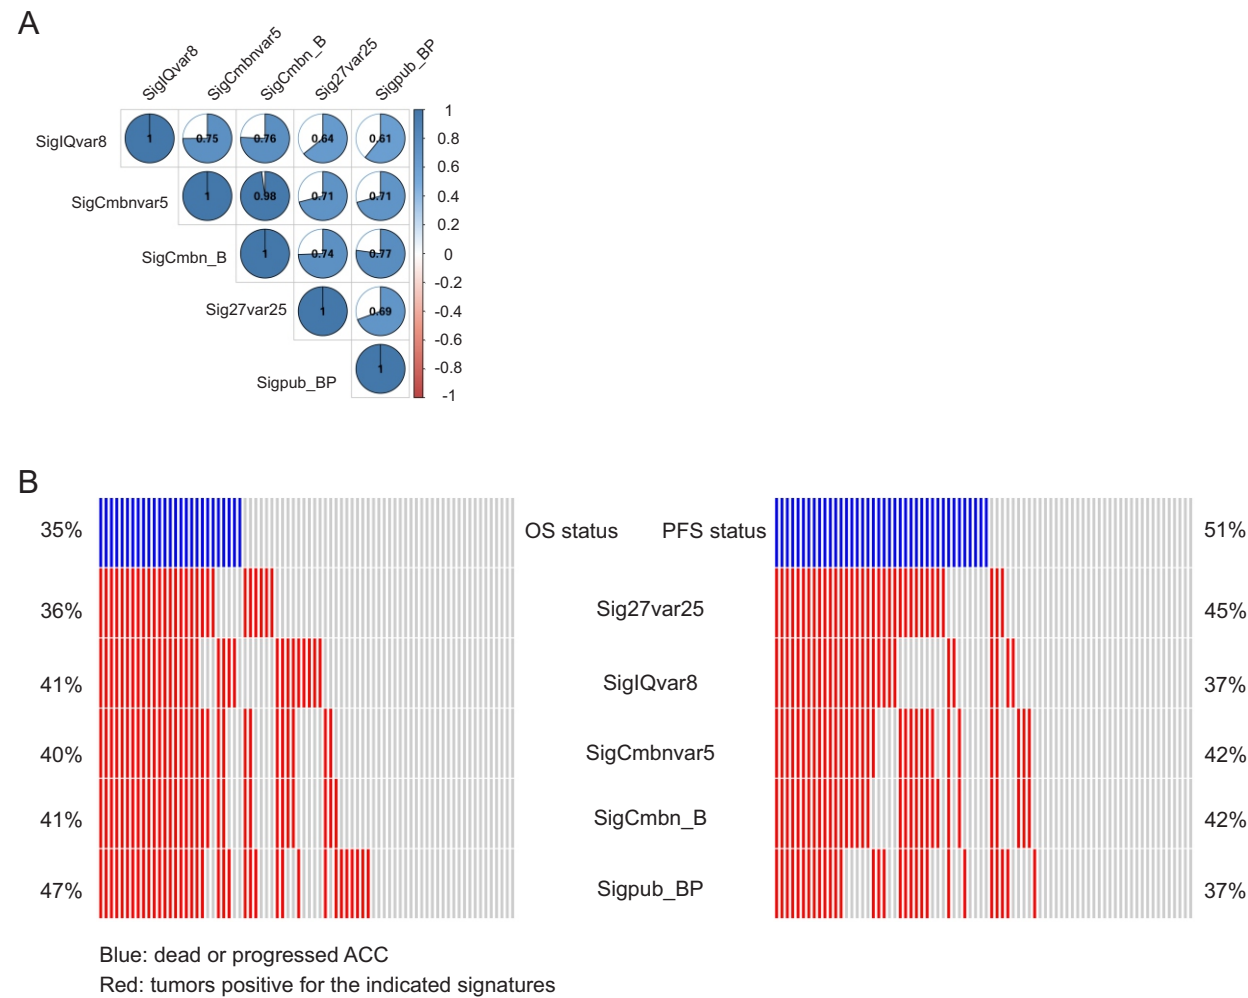

Figure S7: Correlations of Sigpub\_BP with our gene panels (Sig27var25, SiglQvar8, SigCmbnvar5, SibCmbn\_B). (A) The indicated correlations were determined using Spearman correlation. (B) Heatmap was constructed using the “oncoprint” function in the ComplexHeatmap R package [30]. Dead and progressed tumors are marked with blue. ACC positive for the indicated signatures are colored red. Positive and negative tumors were defined according to the respective cutoff points estimated by empirical method. Percentages for the positive events are indicated.
