# Supplementary material for: Prediction of Adrenocortical Carcinoma Relapse and Prognosis with a Set of Novel Multigene Panels
Source: MDPI journal article supplement (doi:10.3390/cancers14112805), 2022-06-05
Supplement: s1 [file s1]

Supplementary Figure S6

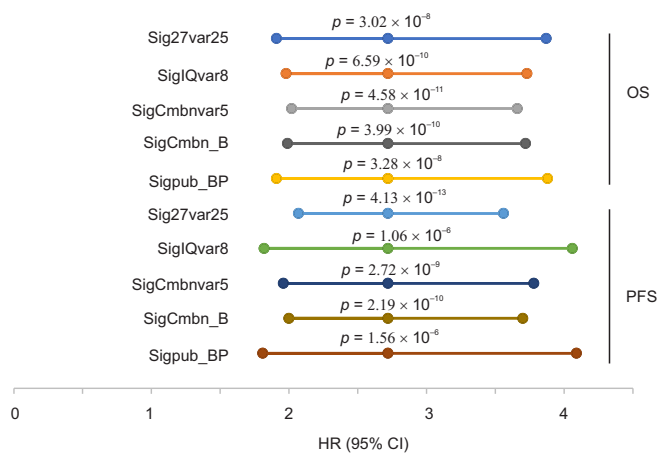

Figure S6: HR (hazard ratio) for Sig27var25, SigIQvar8, SigCmbnvar5, SigCmbn\_B, and Sigpub\_PB in predicting poor OS and worse PFS.
