# Supplementary material for: Prediction of Adrenocortical Carcinoma Relapse and Prognosis with a Set of Novel Multigene Panels
Source: Cancers (Basel). 2022 Jun 5;14(11):2805. doi: 10.3390/cancers14112805 (PMC9179637; doi:10.3390/cancers14112805)
Supplement: Supplementary file 1 [file cancers-14-02805-s001.zip › Table S1.xlsx]

## Sheet: Sheet1
Table S1. Demographics of patient population
Characteristics	n	%
Fatality; NO	58	0.637363
Fatality; YES	33	0.362637
follow up (Months), median (Q1-Q3)	39.3 (21-47.4)
Age at diagnosis (Year), median (Q1-Q3)	48.5 (35.5-47.2)
Female	60	0.652174
Male	32	0.347826
Stage I	9	0.0978261
Stage II	44	0.478261
Stage III	19	0.206522
Stage IV	18	0.195652
NA	2	0.0217391
N0	80	0.869565
N1	10	0.108696
NA	2	0.0217391
T1	9	0.0978261
T2	49	0.532609
T3	11	0.119565
T4	21	0.228261
NA	2	0.0217391
Neoadjuvant befor surgery
No	91	0.98913
Yes	1	0.0108696
Radiation therapy
No	71	0.771739
Yes	18	0.195652
NA	3	0.0326087
Note: fatality status was based on overall survival status; NA: not available
